# Supplementary material for: Mating in the cold. Prolonged sperm storage provides opportunities for forced copulation by male bats during winter
Source: Frontiers journal article supplement (doi:10.3389/fphys.2023.1241470), 2023-09-06
Supplement: Data_Sheet_2.ZIP [file Data_Sheet_2.ZIP]

## Sheet: Sheet1
Supplementary Data 1. Number of captured bats in this study.
Year	Month	Count	Captured	Female						Male
				Age class			Reproductive conditions			Age class			Reproductive conditions
				Adult	Subadult	Juvenile	Pregnant	Lactated	Indistinguishable	Adult	Subadult	Juvenile	Active	Inactive
2011	6	808	25	14	10	0	14	0	10	0	1	0	0	1
2011	7	800	28	23	0	4	0	23	0	0	0	1	0	0
2011	8	512	40	6	2	19	0	6	2	0	0	13	0	0
2011	9	122	43	0	18	11	0	0	18	3	10	1	3	10
2011	10	55	27	5	0	0	0	0	5	22	0	0	22	0
2011	11	144	27	0	15	1	0	0	15	0	9	2	0	9
2011	12	700	93	0	17	0	0	0	17	76	0	0	76	0
2012	1	750	19	0	5	0	0	0	5	7	7	0	7	7
2012	2	745	43	0	17	0	0	0	17	19	4	0	19	4
2012	3	674	23	0	4	0	0	0	4	19	0	0	19	0
2012	4	628	23	0	23	0	0	0	23	0	0	0	0	0
2012	5	730	23	0	23	0	0	0	23	0	0	0	0	0
2012	6	717	13	6	5	0	6	0	5	0	2	0	0	2
2012	7	720	25	15	0	2	0	15	0	0	0	8	0	0
2012	8	265	36	1	3	14	0	1	3	2	0	16	2	0
2012	9	44	39	6	4	0	0	0	10	24	4	1	24	4
2012	10	25	25	1	1	0	0	0	2	8	15	0	8	15
2012	11	20	12	0	4	0	0	0	4	0	0	8	0	0
2012	12	666	31	0	18	0	0	0	18	8	5	0	8	5
2013	1	683	27	0	16	0	0	0	16	4	7	0	4	7
2013	2	705	22	0	11	0	0	0	11	1	9	0	1	9
2013	3	645	20	0	11	0	0	0	11	1	8	0	1	8
2013	4	641	35	28	0	0	2	0	26	7	0	0	0	7
2013	5	590	33	25	0	0	14	0	11	8	0	0	0	8
2013	6	666	21	20	0	0	2	12	6	1	0	0	0	1
2013	7	514	18	11	0	2	0	11	0	1	0	4	0	1
2013	8	777	18	12	0	4	0	12	0	0	0	2	0	0
2013	9	123	17	1	0	5	0	0	1	0	3	8	0	3
2013	10	49	17	6	0	2	0	0	6	8	0	1	8	0
2013	11	13	13	0	3	0	0	0	3	7	3	0	7	3
2013	12	940	20	0	7	0	0	0	7	7	6	0	7	6
2014	1	921	26	0	7	0	0	0	7	15	4	0	15	4
2014	2	766	37	0	14	1	0	0	14	11	11	0	11	11
2014	3	720	54	0	15	0	0	0	15	21	18	0	21	18
2014	4	541	14	1	13	0	0	0	14	0	0	0	0	0
2014	5	528	36	22	4	0	22	0	4	0	10	0	0	10
2014	6	741	76	57	8	0	57	0	8	4	7	0	0	11
2014	7	784	94	63	11	15	0	39	35	0	1	4	0	1
2014	8	137	124	15	10	37	0	0	25	2	12	48	2	12
2014	9	41	29	1	0	16	0	0	1	1	0	11	1	0
2014	10	0	0	0	0	0	0	0	0	0	0	0	0	0
2014	11	89	58	4	4	1	0	0	8	30	19	0	30	19
2014	12	576	45	3	11	0	0	0	14	24	7	0	24	7
2015	1	793	71	5	21	1	0	0	26	30	11	3	30	11
2015	2	580	72	1	31	0	0	0	32	17	18	5	17	18
2015	3	306	47	9	11	1	0	0	20	19	5	2	19	5
2015	4	400	34	7	11	1	0	0	18	9	5	1	4	10
2015	5	598	49	38	0	0	37	0	1	2	9	0	0	11
2015	6	554	74	67	7	0	0	67	7	0	0	0	0	0
2015	7	510	50	38	3	4	0	38	3	0	0	5	0	0
2015	8	200	97	14	9	29	0	14	9	0	1	44	0	1
2015	9	3	3	0	0	0	0	0	0	3	0	0	3	0
2015	10	37	19	0	6	0	0	0	6	6	6	1	6	6
2015	11	7	7	0	1	0	0	0	1	5	1	0	5	1
2015	12	406	65	1	6	0	0	0	7	47	10	1	47	10
2016	1	758	62	0	10	0	0	0	10	36	16	0	36	16
2016	2	771	65	0	27	0	0	0	27	24	14	0	24	14
2016	3	193	57	4	24	0	0	0	28	15	12	2	15	12
2016	4	326	9	2	4	0	0	0	6	0	3	0	0	3
2016	5	265	50	43	5	0	43	0	5	0	2	0	0	2
2016	6	605	n.a.*
2016	7	715	18	7	2	4	0	7	2	0	0	5	0	0
2016	8	0	0	0	0	0	0	0	0	0	0	0	0	0
2016	9	12	12	0	0	0	0	0	0	12	0	0	12	0
2016	10	12	12	0	0	5	0	0	0	2	0	5	2	0
2016	11	239	45	0	5	0	0	0	5	24	16	0	24	16
2016	12	364	42	3	9	0	0	0	12	18	12	0	18	12
2017	1	741	66	6	9	0	0	0	15	41	10	0	41	10
2017	2	614	34	0	1	0	0	0	1	28	5	0	28	5
2017	3	500	29	1	3	0	0	0	4	19	6	0	19	6
*, Capture procedure did not conducted to avoid excessive disturbance to maternity colony.
